# Supplementary material for: Machine learning of native T1 mapping radiomics for classification of hypertrophic cardiomyopathy phenotypes
Source: PubMed Central journal article supplement (PMC8654857; doi:10.1038/s41598-021-02971-z), 2021-12-08
Supplement: 41598_2021_2971_MOESM1_ESM.pdf [file 41598_2021_2971_MOESM1_ESM.pdf]

## ONLINE SUPPLEMENT

### **Machine learning of native T1 mapping radiomics for classification of hypertrophic cardiomyopathy phenotypes**

Alexios S. Antonopoulos<sup>1\*</sup>, Maria Boutsikou<sup>2\*</sup>, Spyridon Simantiris<sup>1</sup>, Andreas Angelopoulos<sup>1</sup>, George Lazaros<sup>1</sup>, Ioannis Panagiotopoulos<sup>1</sup>, Evangelos Oikonomou<sup>1</sup>, Mikela Kanoupaki<sup>2</sup>, Dimitris Tousoulis<sup>1</sup>, Raad H. Mohiaddin<sup>3</sup>, Konstantinos Tsioufis<sup>1</sup>, Charalambos Vlachopoulos<sup>1</sup>

<sup>1</sup>Unit of Inherited Cardiac Conditions and Sports Cardiology, 1<sup>st</sup> Department of Cardiology, National and Kapodistrian University of Athens, Greece

<sup>2</sup>CMR Unit, Mediterraneo Hospital, Attiki, Greece,

<sup>3</sup>CMR Unit, Faculty of Medicine, National Heart and Lung Institute, Imperial College London, UK

**Running title:** T1 radiomics for classification of cardiac phenotypes

**Total word count:** 5,297, **Figures:** 5, **Tables:** 2

\*equally contributed

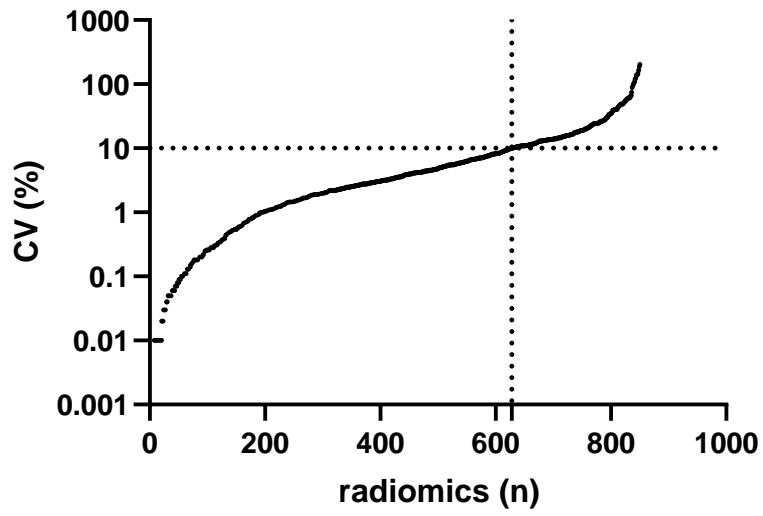

**Figure S1.** Plot of the number ID of radiomic features vs. coefficient of variation (CV). A total of 628 radiomic features had an inter-observer CV < 10%.



**List of individual radiomic features and their coefficient of variation.**

| <b>radiomic features</b>                 | <b>CV%</b> |
|------------------------------------------|------------|
| shapeMaximum3DDiameter                   | 3.03%      |
| shapeMaximum2DDiameterSlice              | 3.03%      |
| shapeSphericity                          | 1.15%      |
| shapeMinorAxis                           | 0.70%      |
| shapeElongation                          | 1.24%      |
| shapeSurfaceVolumeRatio                  | 2.37%      |
| shapeVolume                              | 3.34%      |
| shapeMajorAxis                           | 1.89%      |
| shapeSurfaceArea                         | 1.13%      |
| shapeMaximum2DDiameterColumn             | 2.78%      |
| shapeMaximum2DDiameterRow                | 3.51%      |
| gldmGrayLevelVariance                    | 40.55%     |
| gldmHighGrayLevelEmphasis                | 13.56%     |
| gldmDependenceEntropy                    | 3.28%      |
| gldmDependenceNonUniformity              | 3.98%      |
| gldmGrayLevelNonUniformity               | 13.66%     |
| gldmSmallDependenceEmphasis              | 0.26%      |
| gldmSmallDependenceHighGrayLevelEmphasis | 14.05%     |
| gldmDependenceNonUniformityNormalized    | 0.68%      |
| gldmLargeDependenceEmphasis              | 0.89%      |
| gldmLargeDependenceLowGrayLevelEmphasis  | 1.00%      |
| gldmDependenceVariance                   | 1.22%      |
| gldmLargeDependenceHighGrayLevelEmphasis | 14.02%     |
| gldmSmallDependenceLowGrayLevelEmphasis  | 0.56%      |
| gldmLowGrayLevelEmphasis                 | 0.30%      |
| glcmJointAverage                         | 4.96%      |
| glcmSumAverage                           | 4.96%      |
| glcmJointEntropy                         | 1.14%      |
| glcmClusterShade                         | 108.32%    |
| glcmMaximumProbability                   | 4.41%      |
| glcmIdmn                                 | 0.20%      |
| glcmJointEnergy                          | 7.99%      |
| glcmContrast                             | 13.43%     |
| glcmDifferenceEntropy                    | 1.82%      |
| glcmInverseVariance                      | 4.14%      |
| glcmDifferenceVariance                   | 17.65%     |
| glcmIdn                                  | 0.75%      |
| glcmIdm                                  | 1.70%      |
| glcmCorrelation                          | 6.82%      |
| glcmAutocorrelation                      | 11.80%     |
| glcmSumEntropy                           | 2.86%      |
| glcmMCC                                  | 13.69%     |
| glcmSumSquares                           | 29.98%     |

|                                       |         |
|---------------------------------------|---------|
| glcmClusterProminence                 | 106.99% |
| glcmImc2                              | 1.40%   |
| glcmImc1                              | -14.50% |
| glcmDifferenceAverage                 | 4.99%   |
| glcmId                                | 1.44%   |
| glcmClusterTendency                   | 34.01%  |
| firstorderInterquartileRange          | 13.05%  |
| firstorderSkewness                    | 47.14%  |
| firstorderUniformity                  | 11.05%  |
| firstorderMedian                      | 1.44%   |
| firstorderEnergy                      | 0.18%   |
| firstorderRobustMeanAbsoluteDeviation | 14.09%  |
| firstorderMeanAbsoluteDeviation       | 15.42%  |
| firstorderTotalEnergy                 | 0.18%   |
| firstorderMaximum                     | 8.22%   |
| firstorderRootMeanSquared             | 1.67%   |
| firstorder90Percentile                | 2.65%   |
| firstorderMinimum                     | 0.00%   |
| firstorderEntropy                     | 3.65%   |
| firstorderRange                       | 17.90%  |
| firstorderVariance                    | 39.74%  |
| firstorder10Percentile                | 0.01%   |
| firstorderKurtosis                    | 18.57%  |
| firstorderMean                        | 1.55%   |
| glrlmShortRunLowGrayLevelEmphasis     | 0.49%   |
| glrlmGrayLevelVariance                | 40.70%  |
| glrlmLowGrayLevelRunEmphasis          | 0.44%   |
| glrlmGrayLevelNonUniformityNormalized | 10.93%  |
| glrlmRunVariance                      | 4.63%   |
| glrlmGrayLevelNonUniformity           | 13.59%  |
| glrlmLongRunEmphasis                  | 0.34%   |
| glrlmShortRunHighGrayLevelEmphasis    | 13.70%  |
| glrlmRunLengthNonUniformity           | 3.45%   |
| glrlmShortRunEmphasis                 | 0.02%   |
| glrlmLongRunHighGrayLevelEmphasis     | 13.82%  |
| glrlmRunPercentage                    | 0.07%   |
| glrlmLongRunLowGrayLevelEmphasis      | 0.30%   |
| glrlmRunEntropy                       | 3.40%   |
| glrlmHighGrayLevelRunEmphasis         | 13.66%  |
| glrlmRunLengthNonUniformityNormalized | 0.04%   |
| glszmGrayLevelVariance                | 40.70%  |
| glszmZoneVariance                     | 6.72%   |
| glszmGrayLevelNonUniformityNormalized | 10.32%  |
| glszmSizeZoneNonUniformityNormalized  | 0.03%   |

|                                             |         |
|---------------------------------------------|---------|
| glszmSizeZoneNonUniformity                  | 3.55%   |
| glszmGrayLevelNonUniformity                 | 13.12%  |
| glszmLargeAreaEmphasis                      | 1.43%   |
| glszmSmallAreaHighGrayLevelEmphasis         | 14.56%  |
| glszmZonePercentage                         | 0.19%   |
| glszmLargeAreaLowGrayLevelEmphasis          | 0.30%   |
| glszmLargeAreaHighGrayLevelEmphasis         | 14.57%  |
| glszmHighGrayLevelZoneEmphasis              | 14.11%  |
| glszmSmallAreaEmphasis                      | 0.01%   |
| glszmLowGrayLevelZoneEmphasis               | 0.70%   |
| glszmZoneEntropy                            | 2.92%   |
| glszmSmallAreaLowGrayLevelEmphasis          | 0.83%   |
| ngtdmCoarseness                             | 10.24%  |
| ngtdmComplexity                             | 48.52%  |
| ngtdmStrength                               | 74.40%  |
| ngtdmContrast                               | 7.55%   |
| ngtdmBusyness                               | 21.26%  |
| HLLgldmGrayLevelVariance                    | 11.81%  |
| HLLgldmHighGrayLevelEmphasis                | 2.03%   |
| HLLgldmDependenceEntropy                    | 0.16%   |
| HLLgldmDependenceNonUniformity              | 2.78%   |
| HLLgldmGrayLevelNonUniformity               | 4.70%   |
| HLLgldmSmallDependenceEmphasis              | 0.25%   |
| HLLgldmSmallDependenceHighGrayLevelEmphasis | 2.03%   |
| HLLgldmDependenceNonUniformityNormalized    | 0.60%   |
| HLLgldmLargeDependenceEmphasis              | 2.48%   |
| HLLgldmLargeDependenceLowGrayLevelEmphasis  | 1.50%   |
| HLLgldmDependenceVariance                   | 7.15%   |
| HLLgldmLargeDependenceHighGrayLevelEmphasis | 0.54%   |
| HLLgldmSmallDependenceLowGrayLevelEmphasis  | 4.88%   |
| HLLgldmLowGrayLevelEmphasis                 | 4.29%   |
| HLLglcmJointAverage                         | 0.99%   |
| HLLglcmSumAverage                           | 0.99%   |
| HLLglcmJointEntropy                         | 0.20%   |
| HLLglcmClusterShade                         | -56.41% |
| HLLglcmMaximumProbability                   | 6.64%   |
| HLLglcmIdmn                                 | 0.08%   |
| HLLglcmJointEnergy                          | 1.46%   |
| HLLglcmContrast                             | 10.38%  |
| HLLglcmDifferenceEntropy                    | 1.04%   |
| HLLglcmInverseVariance                      | 1.87%   |
| HLLglcmDifferenceVariance                   | 13.85%  |
| HLLglcmIdn                                  | 0.28%   |
| HLLglcmIdm                                  | 1.91%   |

|                                          |         |
|------------------------------------------|---------|
| HLLglcmCorrelation                       | 10.83%  |
| HLLglcmAutocorrelation                   | 2.36%   |
| HLLglcmSumEntropy                        | 1.23%   |
| HLLglcmMCC                               | 10.99%  |
| HLLglcmSumSquares                        | 15.96%  |
| HLLglcmClusterProminence                 | 65.85%  |
| HLLglcmImc2                              | 0.77%   |
| HLLglcmImc1                              | -5.51%  |
| HLLglcmDifferenceAverage                 | 3.70%   |
| HLLglcmId                                | 1.51%   |
| HLLglcmClusterTendency                   | 19.01%  |
| HLLfirstorderInterquartileRange          | 2.94%   |
| HLLfirstorderSkewness                    | -30.28% |
| HLLfirstorderUniformity                  | 1.45%   |
| HLLfirstorderMedian                      | 39.29%  |
| HLLfirstorderEnergy                      | 8.25%   |
| HLLfirstorderRobustMeanAbsoluteDeviation | 3.17%   |
| HLLfirstorderMeanAbsoluteDeviation       | 3.98%   |
| HLLfirstorderTotalEnergy                 | 8.25%   |
| HLLfirstorderMaximum                     | 15.71%  |
| HLLfirstorderRootMeanSquared             | 5.87%   |
| HLLfirstorder90Percentile                | 2.78%   |
| HLLfirstorderMinimum                     | 0.00%   |
| HLLfirstorderEntropy                     | 0.52%   |
| HLLfirstorderRange                       | 7.53%   |
| HLLfirstorderVariance                    | 11.72%  |
| HLLfirstorder10Percentile                | -1.41%  |
| HLLfirstorderKurtosis                    | 12.27%  |
| HLLfirstorderMean                        | 43.32%  |
| HLLglrlmShortRunLowGrayLevelEmphasis     | 4.37%   |
| HLLglrlmGrayLevelVariance                | 11.74%  |
| HLLglrlmLowGrayLevelRunEmphasis          | 4.28%   |
| HLLglrlmGrayLevelNonUniformityNormalized | 1.15%   |
| HLLglrlmRunVariance                      | 2.70%   |
| HLLglrlmGrayLevelNonUniformity           | 4.30%   |
| HLLglrlmLongRunEmphasis                  | 0.34%   |
| HLLglrlmShortRunHighGrayLevelEmphasis    | 2.10%   |
| HLLglrlmRunLengthNonUniformity           | 2.95%   |
| HLLglrlmShortRunEmphasis                 | 0.10%   |
| HLLglrlmLongRunHighGrayLevelEmphasis     | 1.69%   |
| HLLglrlmRunPercentage                    | 0.13%   |
| HLLglrlmLongRunLowGrayLevelEmphasis      | 3.91%   |
| HLLglrlmRunEntropy                       | 0.26%   |
| HLLglrlmHighGrayLevelRunEmphasis         | 2.01%   |

|                                             |         |
|---------------------------------------------|---------|
| HLLgIrlmRunLengthNonUniformityNormalized    | 0.28%   |
| HLLgIszmGrayLevelVariance                   | 11.92%  |
| HLLgIszmZoneVariance                        | 0.09%   |
| HLLgIszmGrayLevelNonUniformityNormalized    | 0.50%   |
| HLLgIszmSizeZoneNonUniformityNormalized     | 0.18%   |
| HLLgIszmSizeZoneNonUniformity               | 3.06%   |
| HLLgIszmGrayLevelNonUniformity              | 3.70%   |
| HLLgIszmLargeAreaEmphasis                   | 0.20%   |
| HLLgIszmSmallAreaHighGrayLevelEmphasis      | 1.79%   |
| HLLgIszmZonePercentage                      | 0.13%   |
| HLLgIszmLargeAreaLowGrayLevelEmphasis       | 3.45%   |
| HLLgIszmLargeAreaHighGrayLevelEmphasis      | 1.76%   |
| HLLgIszmHighGrayLevelZoneEmphasis           | 1.90%   |
| HLLgIszmSmallAreaEmphasis                   | 0.08%   |
| HLLgIszmLowGrayLevelZoneEmphasis            | 4.54%   |
| HLLgIszmZoneEntropy                         | 0.20%   |
| HLLgIszmSmallAreaLowGrayLevelEmphasis       | 4.83%   |
| HLLngtdmCoarseness                          | 1.80%   |
| HLLngtdmComplexity                          | 20.18%  |
| HLLngtdmStrength                            | 22.36%  |
| HLLngtdmContrast                            | 5.22%   |
| HLLngtdmBusyness                            | 5.51%   |
| LHLgIdmGrayLevelVariance                    | 5.49%   |
| LHLgIdmHighGrayLevelEmphasis                | 24.15%  |
| LHLgIdmDependenceEntropy                    | 0.07%   |
| LHLgIdmDependenceNonUniformity              | 0.17%   |
| LHLgIdmGrayLevelNonUniformity               | 5.95%   |
| LHLgIdmSmallDependenceEmphasis              | 2.21%   |
| LHLgIdmSmallDependenceHighGrayLevelEmphasis | 27.93%  |
| LHLgIdmDependenceNonUniformityNormalized    | 3.77%   |
| LHLgIdmLargeDependenceEmphasis              | 2.64%   |
| LHLgIdmLargeDependenceLowGrayLevelEmphasis  | 13.21%  |
| LHLgIdmDependenceVariance                   | 0.35%   |
| LHLgIdmLargeDependenceHighGrayLevelEmphasis | 18.87%  |
| LHLgIdmSmallDependenceLowGrayLevelEmphasis  | 7.58%   |
| LHLgIdmLowGrayLevelEmphasis                 | 9.23%   |
| LHLgIcmJointAverage                         | 11.58%  |
| LHLgIcmSumAverage                           | 11.58%  |
| LHLgIcmJointEntropy                         | 0.28%   |
| LHLgIcmClusterShade                         | -16.24% |
| LHLgIcmMaximumProbability                   | 2.54%   |
| LHLgIcmIdmn                                 | 0.27%   |
| LHLgIcmJointEnergy                          | 2.62%   |
| LHLgIcmContrast                             | 8.52%   |



|                                          |         |
|------------------------------------------|---------|
| LHLglcmDifferenceEntropy                 | 0.73%   |
| LHLglcmInverseVariance                   | 4.65%   |
| LHLglcmDifferenceVariance                | 12.28%  |
| LHLglcmIdn                               | 0.62%   |
| LHLglcmIdm                               | 4.17%   |
| LHLglcmCorrelation                       | 2.19%   |
| LHLglcmAutocorrelation                   | 25.40%  |
| LHLglcmSumEntropy                        | 0.71%   |
| LHLglcmMCC                               | 8.38%   |
| LHLglcmSumSquares                        | 7.38%   |
| LHLglcmClusterProminence                 | 17.24%  |
| LHLglcmImc2                              | 1.10%   |
| LHLglcmImc1                              | -6.44%  |
| LHLglcmDifferenceAverage                 | 3.05%   |
| LHLglcmId                                | 2.30%   |
| LHLglcmClusterTendency                   | 6.75%   |
| LHLfirstorderInterquartileRange          | 1.58%   |
| LHLfirstorderSkewness                    | -2.31%  |
| LHLfirstorderUniformity                  | 2.79%   |
| LHLfirstorderMedian                      | 31.93%  |
| LHLfirstorderEnergy                      | 2.47%   |
| LHLfirstorderRobustMeanAbsoluteDeviation | 1.94%   |
| LHLfirstorderMeanAbsoluteDeviation       | 2.25%   |
| LHLfirstorderTotalEnergy                 | 2.47%   |
| LHLfirstorderMaximum                     | 7.04%   |
| LHLfirstorderRootMeanSquared             | 3.02%   |
| LHLfirstorder90Percentile                | 6.70%   |
| LHLfirstorderMinimum                     | -12.92% |
| LHLfirstorderEntropy                     | 0.79%   |
| LHLfirstorderRange                       | 10.32%  |
| LHLfirstorderVariance                    | 5.82%   |
| LHLfirstorder10Percentile                | -0.50%  |
| LHLfirstorderKurtosis                    | 6.92%   |
| LHLfirstorderMean                        | 45.19%  |
| LHLglrlmShortRunLowGrayLevelEmphasis     | 9.01%   |
| LHLglrlmGrayLevelVariance                | 5.64%   |
| LHLglrlmLowGrayLevelRunEmphasis          | 9.20%   |
| LHLglrlmGrayLevelNonUniformityNormalized | 3.01%   |
| LHLglrlmRunVariance                      | 3.53%   |
| LHLglrlmGrayLevelNonUniformity           | 5.93%   |
| LHLglrlmLongRunEmphasis                  | 0.61%   |
| LHLglrlmShortRunHighGrayLevelEmphasis    | 24.66%  |
| LHLglrlmRunLengthNonUniformity           | 2.54%   |
| LHLglrlmShortRunEmphasis                 | 0.22%   |

|                                             |        |
|---------------------------------------------|--------|
| LHLgIrlmLongRunHighGrayLevelEmphasis        | 23.04% |
| LHLgIrlmRunPercentage                       | 0.26%  |
| LHLgIrlmLongRunLowGrayLevelEmphasis         | 9.88%  |
| LHLgIrlmRunEntropy                          | 0.50%  |
| LHLgIrlmHighGrayLevelRunEmphasis            | 24.25% |
| LHLgIrlmRunLengthNonUniformityNormalized    | 0.59%  |
| LHLgIrlmGrayLevelVariance                   | 5.99%  |
| LHLgIrlmZoneVariance                        | 2.55%  |
| LHLgIrlmGrayLevelNonUniformityNormalized    | 3.54%  |
| LHLgIrlmSizeZoneNonUniformityNormalized     | 3.32%  |
| LHLgIrlmSizeZoneNonUniformity               | 1.05%  |
| LHLgIrlmGrayLevelNonUniformity              | 5.52%  |
| LHLgIrlmLargeAreaEmphasis                   | 2.51%  |
| LHLgIrlmSmallAreaHighGrayLevelEmphasis      | 26.83% |
| LHLgIrlmZonePercentage                      | 1.30%  |
| LHLgIrlmLargeAreaLowGrayLevelEmphasis       | 11.89% |
| LHLgIrlmLargeAreaHighGrayLevelEmphasis      | 19.77% |
| LHLgIrlmHighGrayLevelZoneEmphasis           | 24.50% |
| LHLgIrlmSmallAreaEmphasis                   | 1.40%  |
| LHLgIrlmLowGrayLevelZoneEmphasis            | 9.23%  |
| LHLgIrlmZoneEntropy                         | 0.22%  |
| LHLgIrlmSmallAreaLowGrayLevelEmphasis       | 8.35%  |
| LHLngtdmCoarseness                          | 4.58%  |
| LHLngtdmComplexity                          | 12.72% |
| LHLngtdmStrength                            | 15.69% |
| LHLngtdmContrast                            | 1.10%  |
| LHLngtdmBusyness                            | 14.77% |
| LHHgldmGrayLevelVariance                    | 0.18%  |
| LHHgldmHighGrayLevelEmphasis                | 0.90%  |
| LHHgldmDependenceEntropy                    | 0.45%  |
| LHHgldmDependenceNonUniformity              | 4.31%  |
| LHHgldmGrayLevelNonUniformity               | 3.18%  |
| LHHgldmSmallDependenceEmphasis              | 7.22%  |
| LHHgldmSmallDependenceHighGrayLevelEmphasis | 0.38%  |
| LHHgldmDependenceNonUniformityNormalized    | 1.04%  |
| LHHgldmLargeDependenceEmphasis              | 0.26%  |
| LHHgldmLargeDependenceLowGrayLevelEmphasis  | 2.78%  |
| LHHgldmDependenceVariance                   | 2.76%  |
| LHHgldmLargeDependenceHighGrayLevelEmphasis | 2.20%  |
| LHHgldmSmallDependenceLowGrayLevelEmphasis  | 16.41% |
| LHHgldmLowGrayLevelEmphasis                 | 0.94%  |
| LHHglcmJointAverage                         | 0.79%  |
| LHHglcmSumAverage                           | 0.79%  |
| LHHglcmJointEntropy                         | 0.34%  |

|                                          |              |
|------------------------------------------|--------------|
| LHHglcmClusterShade                      | -<br>164.85% |
| LHHglcmMaximumProbability                | 4.57%        |
| LHHglcmIdmn                              | 0.09%        |
| LHHglcmJointEnergy                       | 0.87%        |
| LHHglcmContrast                          | 1.00%        |
| LHHglcmDifferenceEntropy                 | 0.45%        |
| LHHglcmInverseVariance                   | 1.00%        |
| LHHglcmDifferenceVariance                | 0.59%        |
| LHHglcmIdn                               | 0.16%        |
| LHHglcmIdm                               | 0.25%        |
| LHHglcmCorrelation                       | 3.56%        |
| LHHglcmAutocorrelation                   | 1.62%        |
| LHHglcmSumEntropy                        | 0.16%        |
| LHHglcmMCC                               | 3.56%        |
| LHHglcmSumSquares                        | 0.18%        |
| LHHglcmClusterProminence                 | 0.54%        |
| LHHglcmImc2                              | 3.17%        |
| LHHglcmImc1                              | -9.39%       |
| LHHglcmDifferenceAverage                 | 1.00%        |
| LHHglcmId                                | 0.25%        |
| LHHglcmClusterTendency                   | 0.38%        |
| LHHfirstorderInterquartileRange          | 4.69%        |
| LHHfirstorderSkewness                    | -50.60%      |
| LHHfirstorderUniformity                  | 0.18%        |
| LHHfirstorderMedian                      | 32.89%       |
| LHHfirstorderEnergy                      | 2.77%        |
| LHHfirstorderRobustMeanAbsoluteDeviation | 3.14%        |
| LHHfirstorderMeanAbsoluteDeviation       | 2.81%        |
| LHHfirstorderTotalEnergy                 | 2.77%        |
| LHHfirstorderMaximum                     | 15.45%       |
| LHHfirstorderRootMeanSquared             | 3.18%        |
| LHHfirstorder90Percentile                | 5.45%        |
| LHHfirstorderMinimum                     | 0.00%        |
| LHHfirstorderEntropy                     | 0.13%        |
| LHHfirstorderRange                       | 5.82%        |
| LHHfirstorderVariance                    | 5.93%        |
| LHHfirstorder10Percentile                | -1.03%       |
| LHHfirstorderKurtosis                    | 3.06%        |
| LHHfirstorderMean                        | 94.70%       |
| LHHglrlmShortRunLowGrayLevelEmphasis     | 2.15%        |
| LHHglrlmGrayLevelVariance                | 0.05%        |
| LHHglrlmLowGrayLevelRunEmphasis          | 0.31%        |
| LHHglrlmGrayLevelNonUniformityNormalized | 0.05%        |
| LHHglrlmRunVariance                      | 2.19%        |

|                                             |         |
|---------------------------------------------|---------|
| LHHglrlmGrayLevelNonUniformity              | 3.13%   |
| LHHglrlmLongRunEmphasis                     | 0.35%   |
| LHHglrlmShortRunHighGrayLevelEmphasis       | 2.60%   |
| LHHglrlmRunLengthNonUniformity              | 3.12%   |
| LHHglrlmShortRunEmphasis                    | 0.37%   |
| LHHglrlmLongRunHighGrayLevelEmphasis        | 1.42%   |
| LHHglrlmRunPercentage                       | 0.28%   |
| LHHglrlmLongRunLowGrayLevelEmphasis         | 2.20%   |
| LHHglrlmRunEntropy                          | 0.06%   |
| LHHglrlmHighGrayLevelRunEmphasis            | 0.29%   |
| LHHglrlmRunLengthNonUniformityNormalized    | 0.18%   |
| LHHglszmGrayLevelVariance                   | 1.98%   |
| LHHglszmZoneVariance                        | 10.88%  |
| LHHglszmGrayLevelNonUniformityNormalized    | 1.98%   |
| LHHglszmSizeZoneNonUniformityNormalized     | 0.57%   |
| LHHglszmSizeZoneNonUniformity               | 2.59%   |
| LHHglszmGrayLevelNonUniformity              | 5.29%   |
| LHHglszmLargeAreaEmphasis                   | 11.28%  |
| LHHglszmSmallAreaHighGrayLevelEmphasis      | 4.92%   |
| LHHglszmZonePercentage                      | 7.00%   |
| LHHglszmLargeAreaLowGrayLevelEmphasis       | 15.73%  |
| LHHglszmLargeAreaHighGrayLevelEmphasis      | 7.11%   |
| LHHglszmHighGrayLevelZoneEmphasis           | 6.55%   |
| LHHglszmSmallAreaEmphasis                   | 59.81%  |
| LHHglszmLowGrayLevelZoneEmphasis            | 6.72%   |
| LHHglszmZoneEntropy                         | 2.37%   |
| LHHglszmSmallAreaLowGrayLevelEmphasis       | 187.08% |
| LHHngtdmCoarseness                          | 4.65%   |
| LHHngtdmComplexity                          | 0.98%   |
| LHHngtdmStrength                            | 4.57%   |
| LHHngtdmContrast                            | 1.08%   |
| LHHngtdmBusyness                            | 7.70%   |
| LLHgldmGrayLevelVariance                    | 3.57%   |
| LLHgldmHighGrayLevelEmphasis                | 0.01%   |
| LLHgldmDependenceEntropy                    | 1.34%   |
| LLHgldmDependenceNonUniformity              | 6.35%   |
| LLHgldmGrayLevelNonUniformity               | 3.37%   |
| LLHgldmSmallDependenceEmphasis              | 4.02%   |
| LLHgldmSmallDependenceHighGrayLevelEmphasis | 4.07%   |
| LLHgldmDependenceNonUniformityNormalized    | 3.22%   |
| LLHgldmLargeDependenceEmphasis              | 1.69%   |
| LLHgldmLargeDependenceLowGrayLevelEmphasis  | 1.69%   |
| LLHgldmDependenceVariance                   | 1.10%   |
| LLHgldmLargeDependenceHighGrayLevelEmphasis | 1.69%   |

|                                            |         |
|--------------------------------------------|---------|
| LLHglcmSmallDependenceLowGrayLevelEmphasis | 3.90%   |
| LLHglcmLowGrayLevelEmphasis                | 0.04%   |
| LLHglcmJointAverage                        | 0.01%   |
| LLHglcmSumAverage                          | 0.01%   |
| LLHglcmJointEntropy                        | 3.02%   |
| LLHglcmClusterShade                        | -3.98%  |
| LLHglcmMaximumProbability                  | 0.03%   |
| LLHglcmIdmn                                | 0.01%   |
| LLHglcmJointEnergy                         | 0.05%   |
| LLHglcmContrast                            | 4.18%   |
| LLHglcmDifferenceEntropy                   | 2.89%   |
| LLHglcmInverseVariance                     | 4.18%   |
| LLHglcmDifferenceVariance                  | 4.12%   |
| LLHglcmIdn                                 | 0.01%   |
| LLHglcmIdm                                 | 0.01%   |
| LLHglcmCorrelation                         | -4.21%  |
| LLHglcmAutocorrelation                     | 0.01%   |
| LLHglcmSumEntropy                          | 2.89%   |
| LLHglcmMCC                                 | 4.21%   |
| LLHglcmSumSquares                          | 4.15%   |
| LLHglcmClusterProminence                   | 3.92%   |
| LLHglcmImc2                                | 4.20%   |
| LLHglcmImc1                                | -5.44%  |
| LLHglcmDifferenceAverage                   | 4.18%   |
| LLHglcmId                                  | 0.01%   |
| LLHglcmClusterTendency                     | 4.12%   |
| LLHfirstorderInterquartileRange            | 3.52%   |
| LLHfirstorderSkewness                      | 120.18% |
| LLHfirstorderUniformity                    | 0.02%   |
| LLHfirstorderMedian                        | 1.54%   |
| LLHfirstorderEnergy                        | 1.47%   |
| LLHfirstorderRobustMeanAbsoluteDeviation   | 1.85%   |
| LLHfirstorderMeanAbsoluteDeviation         | 3.98%   |
| LLHfirstorderTotalEnergy                   | 1.47%   |
| LLHfirstorderMaximum                       | 18.84%  |
| LLHfirstorderRootMeanSquared               | 2.52%   |
| LLHfirstorder90Percentile                  | 2.04%   |
| LLHfirstorderMinimum                       | 0.00%   |
| LLHfirstorderEntropy                       | 3.03%   |
| LLHfirstorderRange                         | 17.81%  |
| LLHfirstorderVariance                      | 10.82%  |
| LLHfirstorder10Percentile                  | 2.19%   |
| LLHfirstorderKurtosis                      | 12.45%  |
| LLHfirstorderMean                          | 2.11%   |

|                                              |        |
|----------------------------------------------|--------|
| LLHglrlmShortRunLowGrayLevelEmphasis         | 4.08%  |
| LLHglrlmGrayLevelVariance                    | 0.30%  |
| LLHglrlmLowGrayLevelRunEmphasis              | 0.01%  |
| LLHglrlmGrayLevelNonUniformityNormalized     | 0.01%  |
| LLHglrlmRunVariance                          | 7.01%  |
| LLHglrlmGrayLevelNonUniformity               | 0.10%  |
| LLHglrlmLongRunEmphasis                      | 6.25%  |
| LLHglrlmShortRunHighGrayLevelEmphasis        | 5.62%  |
| LLHglrlmRunLengthNonUniformity               | 10.89% |
| LLHglrlmShortRunEmphasis                     | 5.23%  |
| LLHglrlmLongRunHighGrayLevelEmphasis         | 6.25%  |
| LLHglrlmRunPercentage                        | 3.48%  |
| LLHglrlmLongRunLowGrayLevelEmphasis          | 6.24%  |
| LLHglrlmRunEntropy                           | 4.44%  |
| LLHglrlmHighGrayLevelRunEmphasis             | 0.00%  |
| LLHglrlmRunLengthNonUniformityNormalized     | 10.95% |
| LLHglslzmGrayLevelVariance                   | 4.00%  |
| LLHglslzmZoneVariance                        | 19.34% |
| LLHglslzmGrayLevelNonUniformityNormalized    | 3.20%  |
| LLHglslzmSizeZoneNonUniformityNormalized     | 24.80% |
| LLHglslzmSizeZoneNonUniformity               | 8.00%  |
| LLHglslzmGrayLevelNonUniformity              | 28.00% |
| LLHglslzmLargeAreaEmphasis                   | 24.37% |
| LLHglslzmSmallAreaHighGrayLevelEmphasis      | 1.67%  |
| LLHglslzmZonePercentage                      | 39.31% |
| LLHglslzmLargeAreaLowGrayLevelEmphasis       | 24.37% |
| LLHglslzmLargeAreaHighGrayLevelEmphasis      | 24.37% |
| LLHglslzmHighGrayLevelZoneEmphasis           | 20.00% |
| LLHglslzmSmallAreaEmphasis                   | 14.58% |
| LLHglslzmLowGrayLevelZoneEmphasis            | 13.33% |
| LLHglslzmZoneEntropy                         | 54.65% |
| LLHglslzmSmallAreaLowGrayLevelEmphasis       | 18.65% |
| LLHngtdmCoarseness                           | 15.09% |
| LLHngtdmComplexity                           | 8.84%  |
| LLHngtdmStrength                             | 6.82%  |
| LLHngtdmContrast                             | 0.52%  |
| LLHngtdmBusyness                             | 11.57% |
| HLHglldmGrayLevelVariance                    | 1.07%  |
| HLHglldmHighGrayLevelEmphasis                | 1.94%  |
| HLHglldmDependenceEntropy                    | 0.09%  |
| HLHglldmDependenceNonUniformity              | 4.70%  |
| HLHglldmGrayLevelNonUniformity               | 2.37%  |
| HLHglldmSmallDependenceEmphasis              | 2.58%  |
| HLHglldmSmallDependenceHighGrayLevelEmphasis | 3.71%  |

|                                             |         |
|---------------------------------------------|---------|
| HLHglDmDependenceNonUniformityNormalized    | 1.45%   |
| HLHglDmLargeDependenceEmphasis              | 3.22%   |
| HLHglDmLargeDependenceLowGrayLevelEmphasis  | 1.97%   |
| HLHglDmDependenceVariance                   | 6.09%   |
| HLHglDmLargeDependenceHighGrayLevelEmphasis | 6.90%   |
| HLHglDmSmallDependenceLowGrayLevelEmphasis  | 1.53%   |
| HLHglDmLowGrayLevelEmphasis                 | 2.23%   |
| HLHglcmJointAverage                         | 1.32%   |
| HLHglcmSumAverage                           | 1.32%   |
| HLHglcmJointEntropy                         | 1.39%   |
| HLHglcmClusterShade                         | -34.94% |
| HLHglcmMaximumProbability                   | 8.04%   |
| HLHglcmIdmn                                 | 0.39%   |
| HLHglcmJointEnergy                          | 3.93%   |
| HLHglcmContrast                             | 4.45%   |
| HLHglcmDifferenceEntropy                    | 1.07%   |
| HLHglcmInverseVariance                      | 4.45%   |
| HLHglcmDifferenceVariance                   | 1.47%   |
| HLHglcmIdn                                  | 0.69%   |
| HLHglcmIdm                                  | 1.12%   |
| HLHglcmCorrelation                          | 13.58%  |
| HLHglcmAutocorrelation                      | 2.83%   |
| HLHglcmSumEntropy                           | 0.59%   |
| HLHglcmMCC                                  | 13.58%  |
| HLHglcmSumSquares                           | 1.50%   |
| HLHglcmClusterProminence                    | 2.45%   |
| HLHglcmImc2                                 | 13.42%  |
| HLHglcmImc1                                 | -13.86% |
| HLHglcmDifferenceAverage                    | 4.45%   |
| HLHglcmId                                   | 1.12%   |
| HLHglcmClusterTendency                      | 0.53%   |
| HLHfirstorderInterquartileRange             | 2.25%   |
| HLHfirstorderSkewness                       | -61.08% |
| HLHfirstorderUniformity                     | 1.04%   |
| HLHfirstorderMedian                         | 46.97%  |
| HLHfirstorderEnergy                         | 9.86%   |
| HLHfirstorderRobustMeanAbsoluteDeviation    | 2.89%   |
| HLHfirstorderMeanAbsoluteDeviation          | 4.02%   |
| HLHfirstorderTotalEnergy                    | 9.86%   |
| HLHfirstorderMaximum                        | 28.67%  |
| HLHfirstorderRootMeanSquared                | 6.64%   |
| HLHfirstorder90Percentile                   | 4.47%   |
| HLHfirstorderMinimum                        | -2.53%  |
| HLHfirstorderEntropy                        | 0.78%   |

|                                           |        |
|-------------------------------------------|--------|
| HLHfirstorderRange                        | 15.26% |
| HLHfirstorderVariance                     | 13.68% |
| HLHfirstorder10Percentile                 | -0.15% |
| HLHfirstorderKurtosis                     | 16.19% |
| HLHfirstorderMean                         | 35.91% |
| HLHglrlmShortRunLowGrayLevelEmphasis      | 0.63%  |
| HLHglrlmGrayLevelVariance                 | 0.06%  |
| HLHglrlmLowGrayLevelRunEmphasis           | 0.48%  |
| HLHglrlmGrayLevelNonUniformityNormalized  | 0.06%  |
| HLHglrlmRunVariance                       | 15.46% |
| HLHglrlmGrayLevelNonUniformity            | 4.80%  |
| HLHglrlmLongRunEmphasis                   | 6.35%  |
| HLHglrlmShortRunHighGrayLevelEmphasis     | 3.29%  |
| HLHglrlmRunLengthNonUniformity            | 7.46%  |
| HLHglrlmShortRunEmphasis                  | 1.91%  |
| HLHglrlmLongRunHighGrayLevelEmphasis      | 11.11% |
| HLHglrlmRunPercentage                     | 1.62%  |
| HLHglrlmLongRunLowGrayLevelEmphasis       | 0.10%  |
| HLHglrlmRunEntropy                        | 0.51%  |
| HLHglrlmHighGrayLevelRunEmphasis          | 0.47%  |
| HLHglrlmRunLengthNonUniformityNormalized  | 2.48%  |
| HLHglslzmGrayLevelVariance                | 2.68%  |
| HLHglslzmZoneVariance                     | 8.41%  |
| HLHglslzmGrayLevelNonUniformityNormalized | 2.42%  |
| HLHglslzmSizeZoneNonUniformityNormalized  | 2.81%  |
| HLHglslzmSizeZoneNonUniformity            | 7.63%  |
| HLHglslzmGrayLevelNonUniformity           | 2.93%  |
| HLHglslzmLargeAreaEmphasis                | 6.08%  |
| HLHglslzmSmallAreaHighGrayLevelEmphasis   | 6.86%  |
| HLHglslzmZonePercentage                   | 1.88%  |
| HLHglslzmLargeAreaLowGrayLevelEmphasis    | 7.61%  |
| HLHglslzmLargeAreaHighGrayLevelEmphasis   | 5.53%  |
| HLHglslzmHighGrayLevelZoneEmphasis        | 3.25%  |
| HLHglslzmSmallAreaEmphasis                | 4.48%  |
| HLHglslzmLowGrayLevelZoneEmphasis         | 2.48%  |
| HLHglslzmZoneEntropy                      | 1.88%  |
| HLHglslzmSmallAreaLowGrayLevelEmphasis    | 2.61%  |
| HLHngtdmCoarseness                        | 8.80%  |
| HLHngtdmComplexity                        | 4.44%  |
| HLHngtdmStrength                          | 8.56%  |
| HLHngtdmContrast                          | 5.23%  |
| HLHngtdmBusyness                          | 13.13% |
| HHHglldmGrayLevelVariance                 | 0.05%  |
| HHHglldmHighGrayLevelEmphasis             | 0.54%  |



|                                             |              |
|---------------------------------------------|--------------|
| HHHglDmDependenceEntropy                    | 0.84%        |
| HHHglDmDependenceNonUniformity              | 5.21%        |
| HHHglDmGrayLevelNonUniformity               | 3.39%        |
| HHHglDmSmallDependenceEmphasis              | 9.49%        |
| HHHglDmSmallDependenceHighGrayLevelEmphasis | 10.92%       |
| HHHglDmDependenceNonUniformityNormalized    | 2.00%        |
| HHHglDmLargeDependenceEmphasis              | 2.46%        |
| HHHglDmLargeDependenceLowGrayLevelEmphasis  | 2.68%        |
| HHHglDmDependenceVariance                   | 4.21%        |
| HHHglDmLargeDependenceHighGrayLevelEmphasis | 2.23%        |
| HHHglDmSmallDependenceLowGrayLevelEmphasis  | 8.08%        |
| HHHglDmLowGrayLevelEmphasis                 | 0.52%        |
| HHHglcmJointAverage                         | 0.11%        |
| HHHglcmSumAverage                           | 0.11%        |
| HHHglcmJointEntropy                         | 0.10%        |
| HHHglcmClusterShade                         | 18.23%       |
| HHHglcmMaximumProbability                   | 1.45%        |
| HHHglcmIdmn                                 | 0.11%        |
| HHHglcmJointEnergy                          | 0.27%        |
| HHHglcmContrast                             | 1.20%        |
| HHHglcmDifferenceEntropy                    | 0.19%        |
| HHHglcmInverseVariance                      | 1.20%        |
| HHHglcmDifferenceVariance                   | 0.26%        |
| HHHglcmIdn                                  | 0.20%        |
| HHHglcmIdm                                  | 0.33%        |
| HHHglcmCorrelation                          | 8.13%        |
| HHHglcmAutocorrelation                      | 0.10%        |
| HHHglcmSumEntropy                           | 0.21%        |
| HHHglcmMCC                                  | 8.13%        |
| HHHglcmSumSquares                           | 0.01%        |
| HHHglcmClusterProminence                    | 0.92%        |
| HHHglcmImc2                                 | 8.07%        |
| HHHglcmImc1                                 | -13.00%      |
| HHHglcmDifferenceAverage                    | 1.20%        |
| HHHglcmId                                   | 0.33%        |
| HHHglcmClusterTendency                      | 0.91%        |
| HHHfirstorderInterquartileRange             | 5.45%        |
| HHHfirstorderSkewness                       | -<br>123.94% |
| HHHfirstorderUniformity                     | 0.05%        |
| HHHfirstorderMedian                         | -22.64%      |
| HHHfirstorderEnergy                         | 15.97%       |
| HHHfirstorderRobustMeanAbsoluteDeviation    | 4.38%        |
| HHHfirstorderMeanAbsoluteDeviation          | 6.21%        |
| HHHfirstorderTotalEnergy                    | 15.97%       |

|                                          |         |
|------------------------------------------|---------|
| HHHfirstorderMaximum                     | 88.78%  |
| HHHfirstorderRootMeanSquared             | 9.45%   |
| HHHfirstorder90Percentile                | 5.69%   |
| HHHfirstorderMinimum                     | -9.69%  |
| HHHfirstorderEntropy                     | 0.03%   |
| HHHfirstorderRange                       | 23.13%  |
| HHHfirstorderVariance                    | 20.91%  |
| HHHfirstorder10Percentile                | -7.00%  |
| HHHfirstorderKurtosis                    | 40.63%  |
| HHHfirstorderMean                        | -34.25% |
| HHHglrlmShortRunLowGrayLevelEmphasis     | 0.07%   |
| HHHglrlmGrayLevelVariance                | 0.05%   |
| HHHglrlmLowGrayLevelRunEmphasis          | 0.66%   |
| HHHglrlmGrayLevelNonUniformityNormalized | 0.05%   |
| HHHglrlmRunVariance                      | 5.97%   |
| HHHglrlmGrayLevelNonUniformity           | 1.96%   |
| HHHglrlmLongRunEmphasis                  | 3.73%   |
| HHHglrlmShortRunHighGrayLevelEmphasis    | 2.31%   |
| HHHglrlmRunLengthNonUniformity           | 1.96%   |
| HHHglrlmShortRunEmphasis                 | 1.09%   |
| HHHglrlmLongRunHighGrayLevelEmphasis     | 2.73%   |
| HHHglrlmRunPercentage                    | 1.53%   |
| HHHglrlmLongRunLowGrayLevelEmphasis      | 4.68%   |
| HHHglrlmRunEntropy                       | 0.38%   |
| HHHglrlmHighGrayLevelRunEmphasis         | 0.69%   |
| HHHglrlmRunLengthNonUniformityNormalized | 0.02%   |
| HHHglszmGrayLevelVariance                | 0.11%   |
| HHHglszmZoneVariance                     | 21.27%  |
| HHHglszmGrayLevelNonUniformityNormalized | 0.11%   |
| HHHglszmSizeZoneNonUniformityNormalized  | 7.17%   |
| HHHglszmSizeZoneNonUniformity            | 19.53%  |
| HHHglszmGrayLevelNonUniformity           | 10.68%  |
| HHHglszmLargeAreaEmphasis                | 20.92%  |
| HHHglszmSmallAreaHighGrayLevelEmphasis   | 52.29%  |
| HHHglszmZonePercentage                   | 15.17%  |
| HHHglszmLargeAreaLowGrayLevelEmphasis    | 19.15%  |
| HHHglszmLargeAreaHighGrayLevelEmphasis   | 22.73%  |
| HHHglszmHighGrayLevelZoneEmphasis        | 0.41%   |
| HHHglszmSmallAreaEmphasis                | 56.26%  |
| HHHglszmLowGrayLevelZoneEmphasis         | 0.45%   |
| HHHglszmZoneEntropy                      | 1.21%   |
| HHHglszmSmallAreaLowGrayLevelEmphasis    | 61.50%  |
| HHHngtdmCoarseness                       | 1.91%   |
| HHHngtdmComplexity                       | 1.61%   |

|                                             |              |
|---------------------------------------------|--------------|
| HHHngtdmStrength                            | 1.90%        |
| HHHngtdmContrast                            | 1.67%        |
| HHHngtdmBusyness                            | 4.54%        |
| HHLgldmGrayLevelVariance                    | 26.07%       |
| HHLgldmHighGrayLevelEmphasis                | 8.47%        |
| HHLgldmDependenceEntropy                    | 0.93%        |
| HHLgldmDependenceNonUniformity              | 2.40%        |
| HHLgldmGrayLevelNonUniformity               | 7.01%        |
| HHLgldmSmallDependenceEmphasis              | 0.54%        |
| HHLgldmSmallDependenceHighGrayLevelEmphasis | 7.48%        |
| HHLgldmDependenceNonUniformityNormalized    | 1.01%        |
| HHLgldmLargeDependenceEmphasis              | 1.54%        |
| HHLgldmLargeDependenceLowGrayLevelEmphasis  | 11.02%       |
| HHLgldmDependenceVariance                   | 2.42%        |
| HHLgldmLargeDependenceHighGrayLevelEmphasis | 10.55%       |
| HHLgldmSmallDependenceLowGrayLevelEmphasis  | 10.86%       |
| HHLgldmLowGrayLevelEmphasis                 | 11.19%       |
| HHLglcmJointAverage                         | 5.34%        |
| HHLglcmSumAverage                           | 5.34%        |
| HHLglcmJointEntropy                         | 1.29%        |
| HHLglcmClusterShade                         | -<br>146.91% |
| HHLglcmMaximumProbability                   | 2.78%        |
| HHLglcmIdmn                                 | 0.18%        |
| HHLglcmJointEnergy                          | 4.17%        |
| HHLglcmContrast                             | 30.03%       |
| HHLglcmDifferenceEntropy                    | 2.68%        |
| HHLglcmInverseVariance                      | 1.74%        |
| HHLglcmDifferenceVariance                   | 44.24%       |
| HHLglcmIdn                                  | 0.84%        |
| HHLglcmIdm                                  | 1.22%        |
| HHLglcmCorrelation                          | 12.89%       |
| HHLglcmAutocorrelation                      | 10.05%       |
| HHLglcmSumEntropy                           | 1.85%        |
| HHLglcmMCC                                  | 5.48%        |
| HHLglcmSumSquares                           | 26.68%       |
| HHLglcmClusterProminence                    | 140.73%      |
| HHLglcmImc2                                 | 5.61%        |
| HHLglcmImc1                                 | -17.90%      |
| HHLglcmDifferenceAverage                    | 7.22%        |
| HHLglcmId                                   | 1.11%        |
| HHLglcmClusterTendency                      | 24.15%       |
| HHLfirstorderInterquartileRange             | 5.51%        |
| HHLfirstorderSkewness                       | -<br>203.97% |

|                                          |         |
|------------------------------------------|---------|
| HHLfirstorderUniformity                  | 3.93%   |
| HHLfirstorderMedian                      | -6.10%  |
| HHLfirstorderEnergy                      | 20.51%  |
| HHLfirstorderRobustMeanAbsoluteDeviation | 3.88%   |
| HHLfirstorderMeanAbsoluteDeviation       | 6.63%   |
| HHLfirstorderTotalEnergy                 | 20.51%  |
| HHLfirstorderMaximum                     | 58.53%  |
| HHLfirstorderRootMeanSquared             | 11.47%  |
| HHLfirstorder90Percentile                | 5.01%   |
| HHLfirstorderMinimum                     | -5.16%  |
| HHLfirstorderEntropy                     | 2.06%   |
| HHLfirstorderRange                       | 24.58%  |
| HHLfirstorderVariance                    | 25.79%  |
| HHLfirstorder10Percentile                | -14.85% |
| HHLfirstorderKurtosis                    | 66.18%  |
| HHLfirstorderMean                        | -10.55% |
| HHLglrlmShortRunLowGrayLevelEmphasis     | 10.91%  |
| HHLglrlmGrayLevelVariance                | 26.11%  |
| HHLglrlmLowGrayLevelRunEmphasis          | 10.98%  |
| HHLglrlmGrayLevelNonUniformityNormalized | 3.61%   |
| HHLglrlmRunVariance                      | 4.16%   |
| HHLglrlmGrayLevelNonUniformity           | 6.58%   |
| HHLglrlmLongRunEmphasis                  | 0.64%   |
| HHLglrlmShortRunHighGrayLevelEmphasis    | 8.26%   |
| HHLglrlmRunLengthNonUniformity           | 3.14%   |
| HHLglrlmShortRunEmphasis                 | 0.04%   |
| HHLglrlmLongRunHighGrayLevelEmphasis     | 9.18%   |
| HHLglrlmRunPercentage                    | 0.15%   |
| HHLglrlmLongRunLowGrayLevelEmphasis      | 10.87%  |
| HHLglrlmRunEntropy                       | 1.64%   |
| HHLglrlmHighGrayLevelRunEmphasis         | 8.37%   |
| HHLglrlmRunLengthNonUniformityNormalized | 0.08%   |
| HHLglszmGrayLevelVariance                | 26.28%  |
| HHLglszmZoneVariance                     | 4.98%   |
| HHLglszmGrayLevelNonUniformityNormalized | 2.87%   |
| HHLglszmSizeZoneNonUniformityNormalized  | 0.03%   |
| HHLglszmSizeZoneNonUniformity            | 2.63%   |
| HHLglszmGrayLevelNonUniformity           | 5.32%   |
| HHLglszmLargeAreaEmphasis                | 2.87%   |
| HHLglszmSmallAreaHighGrayLevelEmphasis   | 7.81%   |
| HHLglszmZonePercentage                   | 0.80%   |
| HHLglszmLargeAreaLowGrayLevelEmphasis    | 9.07%   |
| HHLglszmLargeAreaHighGrayLevelEmphasis   | 11.42%  |
| HHLglszmHighGrayLevelZoneEmphasis        | 8.09%   |

|                                             |         |
|---------------------------------------------|---------|
| HHLglszmSmallAreaEmphasis                   | 0.00%   |
| HHLglszmLowGrayLevelZoneEmphasis            | 10.24%  |
| HHLglszmZoneEntropy                         | 0.89%   |
| HHLglszmSmallAreaLowGrayLevelEmphasis       | 9.89%   |
| HHLngtdmCoarseness                          | 3.34%   |
| HHLngtdmComplexity                          | 39.70%  |
| HHLngtdmStrength                            | 53.27%  |
| HHLngtdmContrast                            | 11.50%  |
| HHLngtdmBusyness                            | 7.61%   |
| LLLgldmGrayLevelVariance                    | 49.15%  |
| LLLgldmHighGrayLevelEmphasis                | 16.39%  |
| LLLgldmDependenceEntropy                    | 1.93%   |
| LLLgldmDependenceNonUniformity              | 2.16%   |
| LLLgldmGrayLevelNonUniformity               | 13.33%  |
| LLLgldmSmallDependenceEmphasis              | 0.56%   |
| LLLgldmSmallDependenceHighGrayLevelEmphasis | 17.77%  |
| LLLgldmDependenceNonUniformityNormalized    | 1.27%   |
| LLLgldmLargeDependenceEmphasis              | 1.56%   |
| LLLgldmLargeDependenceLowGrayLevelEmphasis  | 2.26%   |
| LLLgldmDependenceVariance                   | 4.55%   |
| LLLgldmLargeDependenceHighGrayLevelEmphasis | 12.73%  |
| LLLgldmSmallDependenceLowGrayLevelEmphasis  | 2.29%   |
| LLLgldmLowGrayLevelEmphasis                 | 2.30%   |
| LLLglcmJointAverage                         | 5.83%   |
| LLLglcmSumAverage                           | 5.83%   |
| LLLglcmJointEntropy                         | 0.06%   |
| LLLglcmClusterShade                         | 139.53% |
| LLLglcmMaximumProbability                   | 5.10%   |
| LLLglcmIdmn                                 | 0.22%   |
| LLLglcmJointEnergy                          | 0.91%   |
| LLLglcmContrast                             | 12.89%  |
| LLLglcmDifferenceEntropy                    | 1.24%   |
| LLLglcmInverseVariance                      | 1.45%   |
| LLLglcmDifferenceVariance                   | 14.40%  |
| LLLglcmIdn                                  | 0.87%   |
| LLLglcmIdm                                  | 2.99%   |
| LLLglcmCorrelation                          | 6.88%   |
| LLLglcmAutocorrelation                      | 14.19%  |
| LLLglcmSumEntropy                           | 2.17%   |
| LLLglcmMCC                                  | 6.11%   |
| LLLglcmSumSquares                           | 35.41%  |
| LLLglcmClusterProminence                    | 139.13% |
| LLLglcmImc2                                 | 0.07%   |
| LLLglcmImc1                                 | -8.84%  |

|                                          |        |
|------------------------------------------|--------|
| LLglcmDifferenceAverage                  | 5.50%  |
| LLglcmId                                 | 2.89%  |
| LLglcmClusterTendency                    | 39.97% |
| LLfirstorderInterquartileRange           | 18.07% |
| LLfirstorderSkewness                     | 61.39% |
| LLfirstorderUniformity                   | 10.70% |
| LLfirstorderMedian                       | 1.26%  |
| LLfirstorderEnergy                       | 0.13%  |
| LLfirstorderRobustMeanAbsoluteDeviation  | 18.11% |
| LLfirstorderMeanAbsoluteDeviation        | 18.93% |
| LLfirstorderTotalEnergy                  | 0.13%  |
| LLfirstorderMaximum                      | 10.11% |
| LLfirstorderRootMeanSquared              | 1.70%  |
| LLfirstorder90Percentile                 | 3.17%  |
| LLfirstorderMinimum                      | 0.00%  |
| LLfirstorderEntropy                      | 2.74%  |
| LLfirstorderRange                        | 23.96% |
| LLfirstorderVariance                     | 48.95% |
| LLfirstorder10Percentile                 | 0.03%  |
| LLfirstorderKurtosis                     | 27.19% |
| LLfirstorderMean                         | 1.58%  |
| LLglrlmShortRunLowGrayLevelEmphasis      | 2.20%  |
| LLglrlmGrayLevelVariance                 | 49.11% |
| LLglrlmLowGrayLevelRunEmphasis           | 2.20%  |
| LLglrlmGrayLevelNonUniformityNormalized  | 10.69% |
| LLglrlmRunVariance                       | 6.48%  |
| LLglrlmGrayLevelNonUniformity            | 13.25% |
| LLglrlmLongRunEmphasis                   | 0.30%  |
| LLglrlmShortRunHighGrayLevelEmphasis     | 16.64% |
| LLglrlmRunLengthNonUniformity            | 3.12%  |
| LLglrlmShortRunEmphasis                  | 0.06%  |
| LLglrlmLongRunHighGrayLevelEmphasis      | 15.81% |
| LLglrlmRunPercentage                     | 0.09%  |
| LLglrlmLongRunLowGrayLevelEmphasis       | 2.20%  |
| LLglrlmRunEntropy                        | 2.57%  |
| LLglrlmHighGrayLevelRunEmphasis          | 16.48% |
| LLglrlmRunLengthNonUniformityNormalized  | 0.14%  |
| LLglslzmGrayLevelVariance                | 48.95% |
| LLglslzmZoneVariance                     | 5.76%  |
| LLglslzmGrayLevelNonUniformityNormalized | 10.64% |
| LLglslzmSizeZoneNonUniformityNormalized  | 0.69%  |
| LLglslzmSizeZoneNonUniformity            | 2.33%  |
| LLglslzmGrayLevelNonUniformity           | 12.99% |
| LLglslzmLargeAreaEmphasis                | 1.13%  |

|                                       |        |
|---------------------------------------|--------|
| LLGlszmSmallAreaHighGrayLevelEmphasis | 17.51% |
| LLGlszmZonePercentage                 | 0.39%  |
| LLGlszmLargeAreaLowGrayLevelEmphasis  | 1.86%  |
| LLGlszmLargeAreaHighGrayLevelEmphasis | 14.29% |
| LLGlszmHighGrayLevelZoneEmphasis      | 16.78% |
| LLGlszmSmallAreaEmphasis              | 0.28%  |
| LLGlszmLowGrayLevelZoneEmphasis       | 1.89%  |
| LLGlszmZoneEntropy                    | 2.19%  |
| LLGlszmSmallAreaLowGrayLevelEmphasis  | 1.89%  |
| LLNgtmCoarseness                      | 9.87%  |
| LLNgtmComplexity                      | 34.20% |
| LLNgtmStrength                        | 60.27% |
| LLNgtmContrast                        | 26.83% |
| LLNgtmBusyness                        | 14.82% |
